# Supplementary material
Source: bioRxiv or medRxiv preprint supplement (https://medrxiv.org/highwire/filestream/94817/field_highwire_adjunct_files/0/2020.08.27.20182808-1.pdf)
Supplement: Supplementary file [file 2020.08.27.20182808-1.pdf]

# Supplementary Figure 1

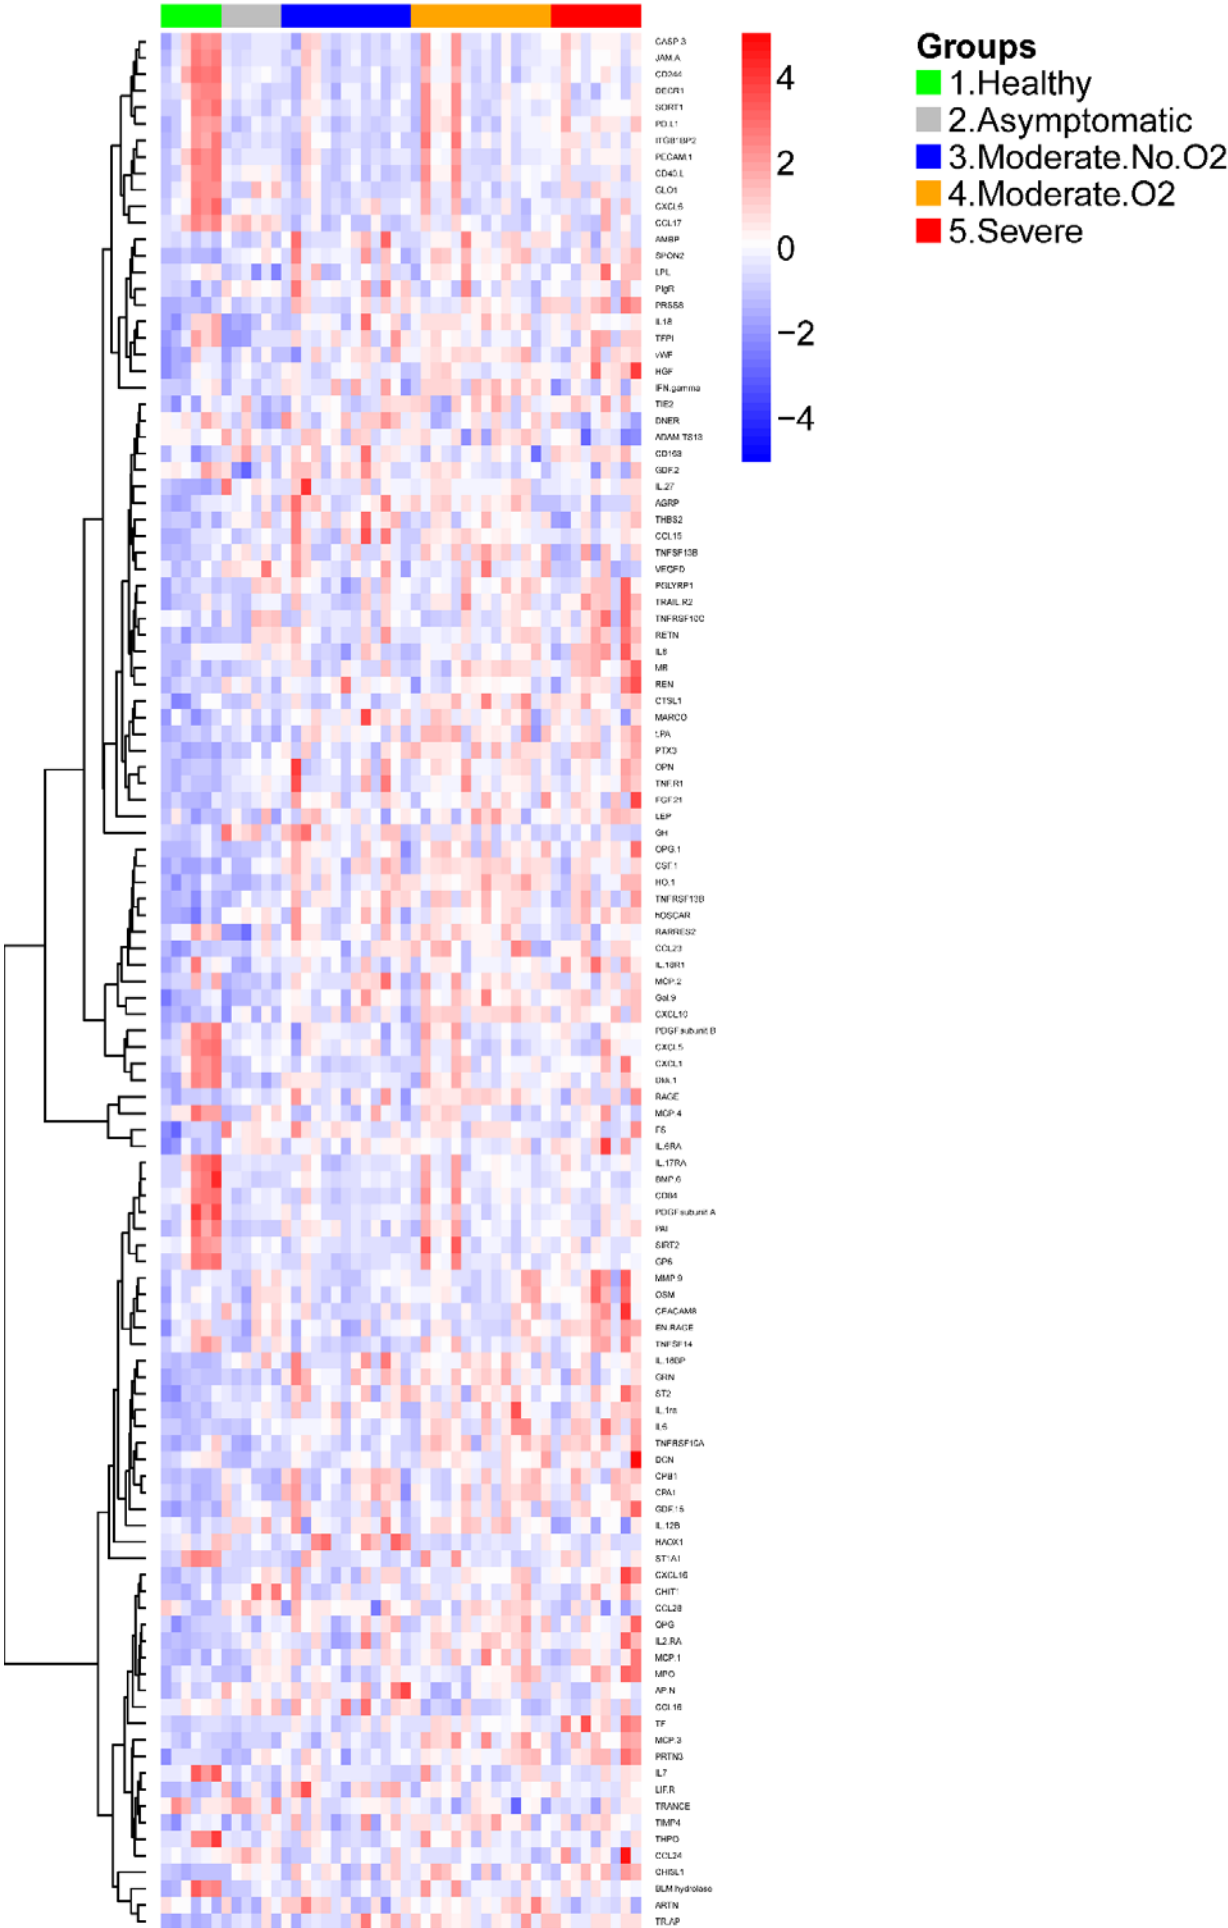

**Supplementary Figure 1:** Heat map of hierarchical clustering of differentially expressed ( $p < 0.05$ ) protein cargo in LEVs from healthy and asymptomatic/symptomatic COVID -19 positive individuals.
